# Supplementary material for: Attitudes and Perception of Risk-stratified Cancer Screening among a Patient-Public Panel in National Cancer Center Japan: A Qualitative study
Source: Research Square preprint supplement (doi:10.21203/rs.3.rs-8044461/v1), 2025-12-09
Supplement: Supplementary file 1 [file 10f2dd135a6f659d7ac144bd.docx]

**Supplementary Appendix 2. English translation of the follow-up questionnaire (after information provision)**

**Post-workshop Questionnaire for Participants of the Patient-Public Panel**

*Note: Participants completed this questionnaire after receiving the information presented at the workshop.*

Thank you for your participation in the workshop. For each of the following questions, please circle only one response (except 3.1.1). Also, please provide your answers to the questions in the narrative sections.

**Section** **I. Impression of the Workshop**

Q 1.1 Please tell us about the topics you found notable or that left an impression on you during the group discussion at the workshop.

[Open-ended question – please describe in your own words]

______________________________________________________________________________________________________________________________________________________________________________________.

**Section** **II. Benefits and harms of cancer screening**

Q 2.1 Did you understand the following terms concerning the benefits (good things) and harms (bad things) of cancer screening?

|  |  | Understood/knew enough to describe it = **1** | Somewhat understood **= 2** | Could not understand **= 3** |
| --- | --- | --- | --- | --- |
| 2.1.1 | Mortality reduction effect | 1 | 2 | 3 |
| 2.1.2 | Cancer incidence-reducing effect | 1 | 2 | 3 |
| 2.1.3 | False positive | 1 | 2 | 3 |
| 2.1.4 | False negative | 1 | 2 | 3 |
| 2.1.5 | Overdiagnosis | 1 | 2 | 3 |
| 2.1.6 | Interval cancer | 1 | 2 | 3 |
| 2.1.7 | Procedural accidents related to detailed examinations | 1 | 2 | 3 |

**Section** **III. Information sharing**

Q 3.1 Please respond to the following questions about how the information should be shared.

| 3.1.1 | What media do you think should be used to disseminate the information on risk-stratified cancer screening?  [choose all that apply] | |
| --- | --- | --- |
|  |  | National Cancer Center website = **1** |
|  |  | Other health websites **= 2** |
|  |  | SNS (Medical, patient advocacy groups, etc.) **= 3** |
|  |  | SNS (Influencers) **= 4** |
|  |  | Web ads **= 5** |
|  |  | TV/Radio/Newspaper = **6** |
|  |  | Health-related journals/books = **7** |
|  |  | Municipal newsletter/websites **= 8** |
|  |  | Other **= 9** |
| 3.1.2 | Which of the above media do you think is the most effective? (circle only one) | |
|  |  | National Cancer Center website = **1** |
|  |  | Other health websites **= 2** |
|  |  | SNS (Medical, patient advocacy groups, etc.) **= 3** |
|  |  | SNS (Influencers) **= 4** |
|  |  | Web ads **= 5** |
|  |  | TV/Radio/Newspaper = **6** |
|  |  | Health-related journals/books = **7** |
|  |  | Municipal newsletter/websites **= 8** |
|  |  | Other **= 9** |

**Section** **IV. Your impression of risk-stratified cancer screening**

Q 4.1 What do you think of risk-stratified cancer screening (in which your degree of risk determines the interval of subsequent examinations)?

|  |  | Feel strongly = **1** | Feel moderately = **2** | Feel slightly = **3** | Do not feel = **4** | Neither = **5** |
| --- | --- | --- | --- | --- | --- | --- |
| 4.1.1 | It provides accurate risk assessments. | 1 | 2 | 3 | 4 | 5 |
| 4.1.2 | Risk assessment is reliable. | 1 | 2 | 3 | 4 | 5 |
| 4.1.3 | It reduces the harms of cancer screening. | 1 | 2 | 3 | 4 | 5 |
| 4.1.4 | It leads to appropriate uses of healthcare resources. | 1 | 2 | 3 | 4 | 5 |
| 4.1.5 | It's difficult to know when the next examination is. | 1 | 2 | 3 | 4 | 5 |
| 4.1.6 | It's unfair to assign different screening intervals for different individuals. | 1 | 2 | 3 | 4 | 5 |

Q 4.2 How would you feel if risk-stratified screening (ABC screening) showed that you were at "high risk" of gastric cancer?

|  |  | Feel strongly = **1** | Feel moderately = **2** | Feel slightly = **3** | Do not feel = **4** | Neither = **5** |
| --- | --- | --- | --- | --- | --- | --- |
| 4.2.1 | Uneasy | 1 | 2 | 3 | 4 | 5 |
| 4.2.2 | Distressed at having to undergo gastroscopy every year | 1 | 2 | 3 | 4 | 5 |
| 4.2.3 | Risk of other cancers would be similarly high. | 1 | 2 | 3 | 4 | 5 |
| 4.2.4 | It undoubtedly means gastric cancer. | 1 | 2 | 3 | 4 | 5 |
| 4.2.5 | Want to undergo gastroscopy as soon as possible. | 1 | 2 | 3 | 4 | 5 |
| 4.2.6 | Want to undergo gastroscopy multiple times every year | 1 | 2 | 3 | 4 | 5 |

Q 4.3 If you are judged to be at "high risk" of gastric cancer based on risk-stratified screening (ABC screening), and as a result the interval of gastroscopy is shortened (2 years to 1 year), what do you think will happen with regard to the following?

|  |  | Increase(s) **= 1** | Unchanged = **2** | Decrease(s) = **3** | Depends on the condition = **4** |
| --- | --- | --- | --- | --- | --- |
| 4.3.1 | Possibility of early cancer detection | 1 | 2 | 3 | 4 |
| 4.3.2 | Harms associated with gastroscopy | 1 | 2 | 3 | 4 |
| 4.3.3 | Physical burden of gastroscopy | 1 | 2 | 3 | 4 |
| 4.3.4 | Time burden of gastroscopy | 1 | 2 | 3 | 4 |
| 4.3.5 | Economic burden of gastroscopy | 1 | 2 | 3 | 4 |

Q 4.4 How would you feel if the risk-stratified screening (ABC screening) showed that you were at "low risk" of gastric cancer?

|  |  | Feel strongly = **1** | Feel moderately = **2** | Feel slightly = **3** | Do not feel = **4** | Neither = **5** |
| --- | --- | --- | --- | --- | --- | --- |
| 4.4.1 | At ease | 1 | 2 | 3 | 4 | 5 |
| 4.4.2 | Risk of other cancers would be similarly low. | 1 | 2 | 3 | 4 | 5 |
| 4.4.3 | No longer need gastric cancer screening | 1 | 2 | 3 | 4 | 5 |
| 4.4.4 | Worried whether I would really be notified of the next gastroscopy (5 years later). | 1 | 2 | 3 | 4 | 5 |

Q 4.5 If you are judged to be at "low risk" of gastric cancer based on risk-stratified screening (ABC screening), and as a result the interval of gastroscopy is widened (2 years to 5 years), what do you think will happen with regard to the following?

|  |  | Increase(s) **= 1** | Unchanged = **2** | Decrease(s) = **3** | Depends on the condition = **4** |
| --- | --- | --- | --- | --- | --- |
| 4.5.1 | Possibility of early cancer detection | 1 | 2 | 3 | 4 |
| 4.5.2 | Harms associated with gastroscopy | 1 | 2 | 3 | 4 |
| 4.5.3 | Physical burden of gastroscopy | 1 | 2 | 3 | 4 |
| 4.5.4 | Time burden of gastroscopy | 1 | 2 | 3 | 4 |
| 4.5.5 | Economic burden of gastroscopy | 1 | 2 | 3 | 4 |

**Section** **V. Acceptance of risk-stratified screening**

Q5.1 Please respond to the following questions about your acceptance of risk-stratified screening.

| 5.1.1 | Would you undergo risk-stratified screening such as ABC screening for gastric cancer? | |
| --- | --- | --- |
|  |  | Yes, I would = 1 |
|  |  | Depends on the conditions = 2 |
|  |  | Not sure = 3 |
|  |  | No = 4 |
| 5.1.2 | Do you think risk-stratified screening such as ABC screening for gastric cancer should be actually performed? | |
|  |  | Yes, I do = 1 =>To 5.2 |
|  |  | Depends on the conditions = 2 =>To 5.3 |
|  |  | Not sure = 3 =>To 5.4 |
|  |  | No = 4 =>To 5.5 |

Q 5.2 (For those who chose "Yes, I do" in 5.1.2) What are the reasons that make you think so? Also, please tell us about any information presented at the review meeting that was useful to you, and any comments you have on it.

[Open-ended question – please describe in your own words]

______________________________________________________________________________________________________________________________________________________________________________________.

Q5.3 (For those who chose "Depends on the conditions" in 5.1.2) Under what conditions would you want to receive it? Also, please tell us about any information presented at the review meeting that was useful to you, and any comments you have on it.

[Open-ended question – please describe in your own words]

______________________________________________________________________________________________________________________________________________________________________________________.

Q5.4 (For those who chose "Not sure" in 5.1.2) What makes you feel that way? Also, please tell us about any information presented at the review meeting that was useful to you, and any comments you have on it.

[Open-ended question – please describe in your own words]

______________________________________________________________________________________________________________________________________________________________________________________.

Q5.5 (For those who chose "No" in 5.1.2) What are the reasons that make you not want to receive it? Also, please tell us about any information presented at the review meeting that was useful to you, and any comments you have on it.

[Open-ended question – please describe in your own words]

______________________________________________________________________________________________________________________________________________________________________________________.

This is the end of the questionnaire. Thank you for your cooperation.
