# Supplementary material for: Attitudes and Perception of Risk-stratified Cancer Screening among a Patient-Public Panel in National Cancer Center Japan: A Qualitative study
Source: Research Square preprint supplement (doi:10.21203/rs.3.rs-8044461/v1), 2025-12-09
Supplement: Supplementary file 2 [file 19801bdfc74093153becd08c.docx]

**Supplementary Appendix 1. English translation of the baseline questionnaire (before information provision)**

**Pre-workshop Questionnaire for Participants of the Patient-Public Panel**

*Note: Before responding to this questionnaire, please review “Pre-* *workshop Handout 1: What is cancer screening?” and “Pre-* *workshop Handout 2: Risk-stratified cancer screening,” which are attached to the e-mail.*

For each of the following questions, please select only one response option, except for Q2.1.2.1 and Q5.1.8.

Please also provide your answers to the questions in the narrative sections.

**Section I. Benefits and harms of cancer screening**

Q1.1 Are you familiar with the following terms about the benefits (good points) and harms (bad points) of cancer screening?

|  |  | Know enough to describe it = **1** | Heard about it = **2** | Never heard about it = **3** |
| --- | --- | --- | --- | --- |
| 1.1.1 | Mortality reduction effect | 1 | 2 | 3 |
| 1.1.2 | Cancer incidence-reducing effect | 1 | 2 | 3 |
| 1.1.3 | False positive | 1 | 2 | 3 |
| 1.1.4 | False negative | 1 | 2 | 3 |
| 1.1.5 | Overdiagnosis | 1 | 2 | 3 |
| 1.1.6 | Interval cancer | 1 | 2 | 3 |
| 1.1.7 | Procedural accidents related to detailed examinations | 1 | 2 | 3 |

**Section** **II. Risk-stratified cancer screening and ABC screening**

Q 2.1 Please respond to the following questions about risk-stratified cancer screening and a type of screening called 'ABC screening for gastric cancer'.

| 2.1.1 | Are you familiar with risk-stratified cancer screening? | |
| --- | --- | --- |
|  |  | Know enough to describe it = **1** |
|  |  | Heard about it **= 2** |
|  |  | Never heard about it **= 3** |
| 2.1.2 | Are you familiar with ABC screening for gastric cancer? | |
|  |  | Know enough to describe it = **1** |
|  |  | Heard about it **= 2** |
|  |  | Never heard about it **= 3 =>To III** |
| 2.1.2.1 | What are your main sources of information on ABC screening for gastric cancer?[choose all that apply] (Do not answer if you chose "Never heard about it" in 2.1.2) | |
|  |  | Health worker = **1** |
|  |  | Family **= 2** |
|  |  | Acquaintance/friend **= 3** |
|  |  | Patient advocacy group **= 4** |
|  |  | National/academic cancer-related website = **5** |
|  |  | Other health websites = **6** |
|  |  | SNS [LINE, X (former Twitter), etc.]= **7** |
|  |  | TV/Radio/Newspaper = **8** |
|  |  | Health-related journals/books = **9** |
|  |  | Municipality **= 10** |
|  |  | Forgot/Can’t recall = **11** |
|  |  | Not sure **= 12** |
| 2.1.2.2 | Of the sources chosen in 2.1.2.1, which one is the most credible to you? [circle only one] (Do not answer if you chose "Forgot/Can’t recall" or “Not sure” in 2.1.2.1) | |
|  |  | Health worker = **1** |
|  |  | Family **= 2** |
|  |  | Acquaintance/friend **= 3** |
|  |  | Patient advocacy group **= 4** |
|  |  | National/academic cancer-related website = **5** |
|  |  | Other health websites = **6** |
|  |  | SNS [LINE, X (formerly Twitter), etc.]= **7** |
|  |  | TV/Radio/Newspaper = **8** |
|  |  | Health-related journals/books = **9** |
|  |  | Municipality **= 10** |

**Section** **III. Your impression of risk-stratified cancer screening**

Q 3.1 What do you think of risk-stratified cancer screening (in which your degree of risk determines the interval of subsequent examinations)?

|  |  | Feel strongly = **1** | Feel moderately = **2** | Feel slightly = **3** | Do not feel = **4** | Neither = **5** |
| --- | --- | --- | --- | --- | --- | --- |
| 3.1.1 | It's reasonable to change the screening interval based on risk assessment. | 1 | 2 | 3 | 4 | 5 |
| 3.1.2 | It enhances the benefits of cancer screening. | 1 | 2 | 3 | 4 | 5 |
| 3.1.3 | It reduces the harms of cancer screening. | 1 | 2 | 3 | 4 | 5 |
| 3.1.4 | It leads to the appropriate use of healthcare resources. | 1 | 2 | 3 | 4 | 5 |
| 3.1.5 | It's difficult to know when the next examination is. | 1 | 2 | 3 | 4 | 5 |
| 3.1.6 | It's unfair to assign different screening intervals for different individuals. | 1 | 2 | 3 | 4 | 5 |

Q 3.2 How would you feel if risk-stratified screening (ABC screening) showed that you were at "high risk" of gastric cancer?

|  |  | Feel strongly = **1** | Feel moderately = **2** | Feel slightly = **3** | Do not feel = **4** | Neither = **5** |
| --- | --- | --- | --- | --- | --- | --- |
| 3.2.1 | Uneasy | 1 | 2 | 3 | 4 | 5 |
| 3.2.2 | Distressed about having to undergo gastroscopy every year | 1 | 2 | 3 | 4 | 5 |
| 3.2.3 | Risk of other cancers would be similarly high. | 1 | 2 | 3 | 4 | 5 |
| 3.2.4 | It undoubtedly means gastric cancer. | 1 | 2 | 3 | 4 | 5 |
| 3.2.5 | Want to undergo gastroscopy as soon as possible. | 1 | 2 | 3 | 4 | 5 |
| 3.2.6 | Want to undergo gastroscopy multiple times every year | 1 | 2 | 3 | 4 | 5 |

Q 3.3 If you are judged to be at "high risk" of gastric cancer based on risk-stratified screening (ABC screening), and as a result the interval of gastroscopy is shortened (2 years to 1 year), what do you think will happen regarding the following?

|  |  | Increase(s) **= 1** | Unchanged = **2** | Decrease(s) = **3** | Depends on the condition = **4** |
| --- | --- | --- | --- | --- | --- |
| 3.3.1 | Possibility of early cancer detection | 1 | 2 | 3 | 4 |
| 3.3.2 | Harms associated with gastroscopy | 1 | 2 | 3 | 4 |
| 3.3.3 | Physical burden of gastroscopy | 1 | 2 | 3 | 4 |
| 3.3.4 | Time burden of gastroscopy | 1 | 2 | 3 | 4 |
| 3.3.5 | Economic burden of gastroscopy | 1 | 2 | 3 | 4 |

Q 3.4 How would you feel if risk-stratified screening (ABC screening) showed that you were at "low risk" of gastric cancer?

|  |  | Feel strongly = **1** | Feel moderately = **2** | Feel slightly = **3** | Do not feel = **4** | Neither = **5** |
| --- | --- | --- | --- | --- | --- | --- |
| 3.4.1 | At ease | 1 | 2 | 3 | 4 | 5 |
| 3.4.2 | Risk of other cancers would be similarly low. | 1 | 2 | 3 | 4 | 5 |
| 3.4.3 | No longer need gastric cancer screening | 1 | 2 | 3 | 4 | 5 |
| 3.4.4 | Worried whether I would really be notified of the next gastroscopy (5 years later). | 1 | 2 | 3 | 4 | 5 |

Q 3.5 If you are judged to be at "low risk" of gastric cancer based on risk-stratified screening (ABC screening), and as a result the interval of gastroscopy is widened (2 years to 5 years), what do you think will happen with regard to the following?

|  |  | Increase(s) **= 1** | Unchanged = **2** | Decrease(s) = **3** | Depends on the condition = **4** |
| --- | --- | --- | --- | --- | --- |
| 3.5.1 | Possibility of early cancer detection | 1 | 2 | 3 | 4 |
| 3.5.2 | Harms associated with gastroscopy | 1 | 2 | 3 | 4 |
| 3.5.3 | Physical burden of gastroscopy | 1 | 2 | 3 | 4 |
| 3.5.4 | Time burden of gastroscopy | 1 | 2 | 3 | 4 |
| 3.5.5 | Economic burden of gastroscopy | 1 | 2 | 3 | 4 |

**Section** **IV. Acceptance of risk-stratified screening**

Q 4.1 Please respond to the following questions about your acceptance of risk-stratified screening.

| 4.1.1 | Would you undergo a risk-stratified screening such as ABC screening for gastric cancer? | |
| --- | --- | --- |
|  |  | Yes, I would **= 1 =>To 4.2** |
|  |  | Depends on the condition = **2 =>To 4.3** |
|  |  | Not sure = **3 =>To 4.4** |
|  |  | No = **4 =>To 4.5** |

Q **4.2 (For those who chose "Yes, I would" in 4.1.1)** What are the reasons that make you want to receive it?

[Open-ended question – please describe in your own words] ______________________________________________________________________________________________________________________________________________________________________________________

Q**4.3 (For those who chose "Depending on the conditions" in 4.1.1)** Under what conditions would you want to receive it?

[Open-ended question – please describe in your own words] ______________________________________________________________________________________________________________________________________________________________________________________

Q**4.4** **(For those who chose "Not sure" in 4.1.1)** What makes you feel that way?

[Open-ended question – please describe in your own words] ______________________________________________________________________________________________________________________________________________________________________________________

Q**4.5 (For those who chose ”No” in 4.1.1)** What are the reasons that make you not want to receive it?

[Open-ended question – please describe in your own words] ______________________________________________________________________________________________________________________________________________________________________________________

**Section** **V. About You**

Q 5.1 Tell us about yourself.

| 5.1.1 | Age | |
| --- | --- | --- |
|  |  | 18-29 years **= 1** |
|  |  | 30-39 years **= 2** |
|  |  | 40-49 years **= 3** |
|  |  | 50-59 years **= 4** |
|  |  | 60-69 years **= 5** |
|  |  | ≥70 years **= 6** |
| 5.1.2 | Sex | |
|  |  | Male **= 1** |
|  |  | Female **= 2** |
|  |  | Other **= 3** |
|  |  | Decline to answer **= 4** |
| 5.1.3 | Are you currently working? | |
|  |  | Yes (Self-employed) **= 1** |
|  |  | Yes (Full-time) **= 2** |
|  |  | Yes (Temporary employee) **=3** |
|  |  | Yes (Part-time) *Excluding students **= 4** |
|  |  | No (Retired) **= 5** |
|  |  | No (Student) **= 6** |
|  |  | No (Others) **= 7** |
| 5.1.4 | Have you worked in a medical institution? | |
|  |  | Yes (Have national healthcare license) **= 1** |
|  |  | Yes (No national healthcare license) **= 2** |
|  |  | No **= 3** |
| 5.1.5 | Have you been diagnosed with cancer? | |
|  |  | Yes **= 1 =>To 5.1.5.1** |
|  |  | No **= 2 =>To 5.1.6** |
|  |  | Decline to answer **= 3 =>To 5.1.6** |
| 5.1.5.1 | How old were you when you were first diagnosed with cancer? | |
|  |  | [Please specify your age in years] __________ years old |
| 5.1.5.2 | What was the site of cancer? | |
|  |  | [Please specify the organ or site] __________________________________________________________ __________________________________________________________ __________________________________________________________ |
| 5.1.5.3 | How was it discovered? | |
|  |  | Cancer screening **= 1** |
|  |  | Complete medical checkup **= 2** |
|  |  | Found by chance in other tests **= 3** |
|  |  | Felt abnormal so visited doctor = **4** |
|  |  | Other **= 5** |
| 5.1.5.4 | What is the current treatment status of the cancer (including palliative care)? | |
|  |  | Inpatient treatment **= 1** |
|  |  | Outpatient (or home care patient) treatment **= 2** |
|  |  | Regularly visiting a hospital but not receiving treatment (completed treatment/follow-up) **= 3** |
|  |  | No regular hospital visits **= 4** |
|  |  | Other **= 5** |
| 5.1.6 | Do you have a family member with cancer? | |
|  |  | Yes **= 1** |
|  |  | No **= 2** |
|  |  | Decline to answer **= 3** |
| 5.1.7 | Do you know anyone close to you with cancer? | |
|  |  | Yes **= 1** |
|  |  | No **= 2** |
|  |  | Decline to answer **= 3** |
| 5.1.8 | Have you received screening for any of the following cancers? [choose all that apply] | |
|  |  | Lung **= 1** |
|  |  | Gastric **= 2** |
|  |  | Colon **= 3** |
|  |  | Breast **= 4** |
|  |  | Cervical = **5** |
|  |  | Others = **6** 　　　　　_[Open-ended question – please describe in your own words]_ |

This is the end of the questionnaire. Thank you for your cooperation.
